# Supplementary material
Source: PubMed Central journal article supplement (PMC11488660)
Supplement: NIHMS2019365-supplement-Final_Supplementary_Material.pdf [file NIHMS2019365-supplement-Final_Supplementary_Material.pdf]

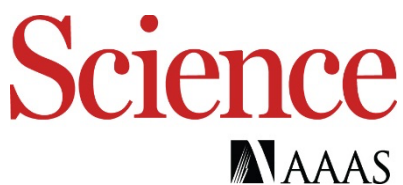

## Supplementary Materials for

### **mRNA-LNP HIV-1 trimer boosters elicit precursors to broad neutralizing antibodies**

Zhenfei Xie, Ying-Cing Lin, Jon M. Steichen, Gabriel Ozorowski, Sven Kratochvil, Rashmi Ray, Jonathan L. Torres, Alessia Liguori, Oleksandr Kalyuzhniy, Xuesong Wang, John E. Warner, Stephanie R. Weldon, Gordon A. Dale, Kathrin H. Kirsch, Usha Nair, Sabyasachi Baboo, Erik Georgeson, Yumiko Adachi, Michael Kubitz, Abigail M. Jackson, Sara T. Richey, Reid M Volk, Jeong Hyun Lee, Jolene K. Diedrich, Thavaleak Prum, Samantha Falcone, Sunny Himansu, Andrea Carfi, John R. Yates III, James C. Paulson, Devin Sok, Andrew B. Ward, William R. Schief, Facundo D. Batista

Corresponding author: [andrew@scripps.edu](mailto:andrew@scripps.edu) (A.B.W.); [schief@scripps.edu](mailto:schief@scripps.edu) (W.R.S.); [fbatista1@mgh.harvard.edu](mailto:fbatista1@mgh.harvard.edu) (F.D.B.)

#### **The PDF file includes:**

Figs. S1 to S11  
Table S1 to S2  
Reference 101

# Figure S1

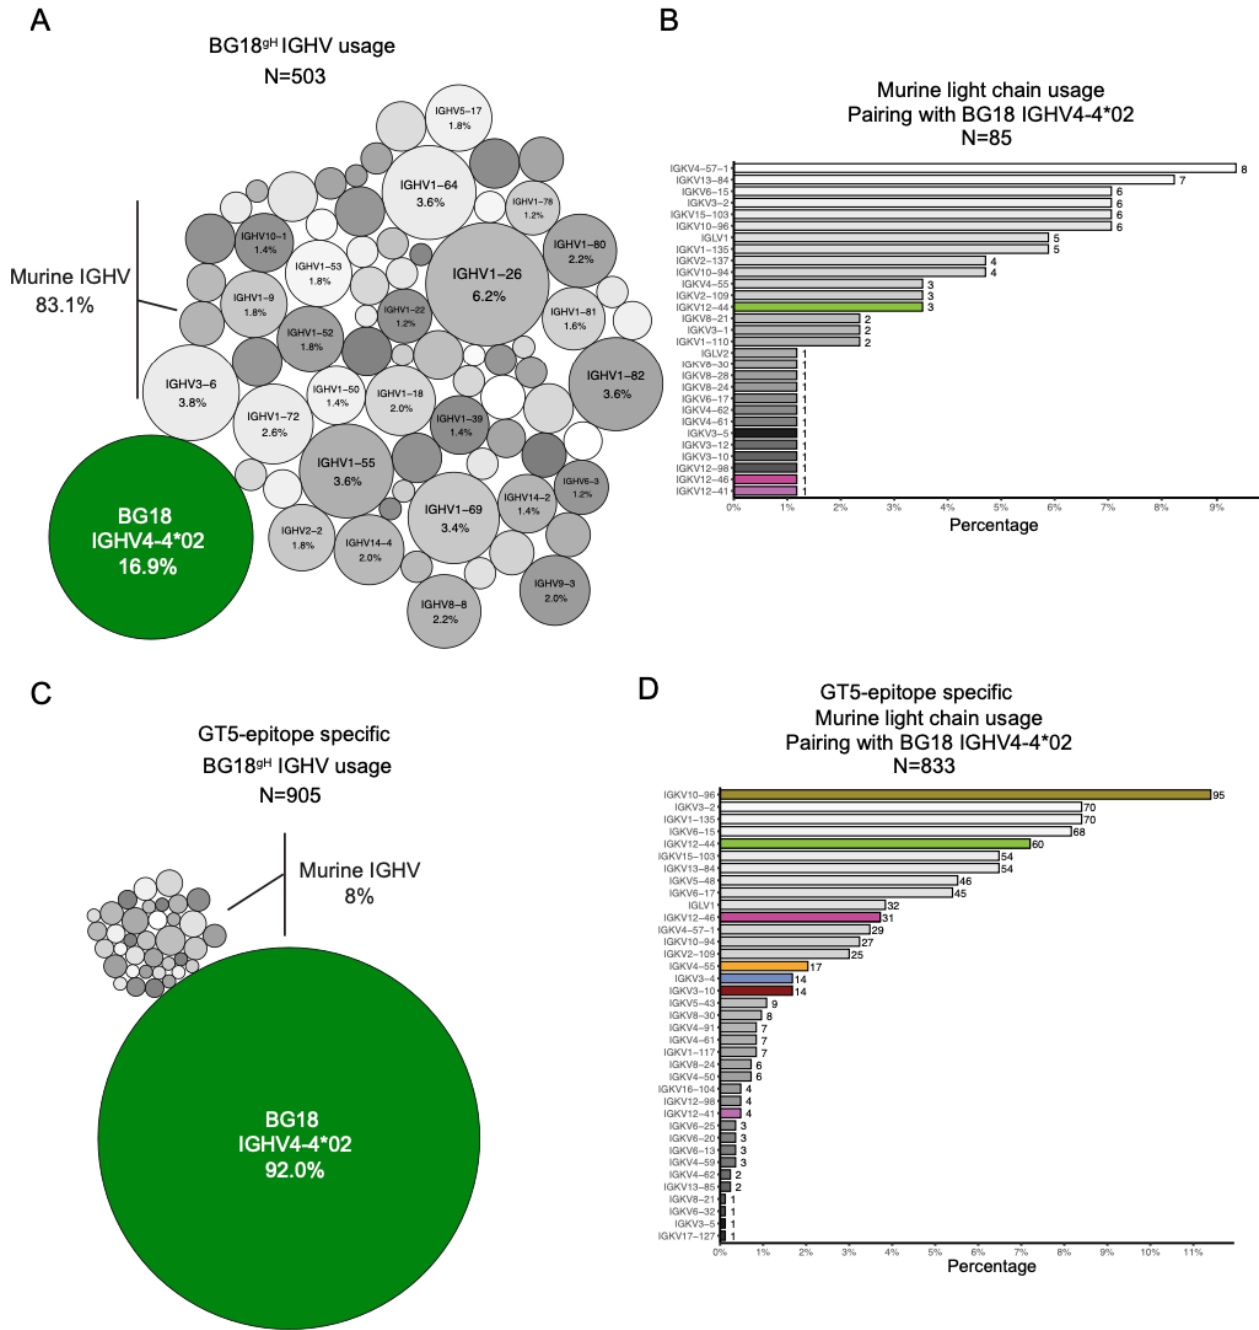

**Figure S1. Characterization of naive BG18<sup>gH</sup> mouse BCR repertoire, related to Figure 1. (A, C) 10x Genomics single-cell BCR sequences pooled from two naive BG18<sup>gH</sup> mice. (A) total (B220<sup>+</sup>) B cells and (C) (B220<sup>+</sup>GT5<sup>+</sup>KO<sup>-</sup>) epitope-specific binders. Relative bubble size shows**

the frequency of IGHV gene usage in splenic B cells. Human BG18 in green; murine IGHVs are presented with greyscale. **(B, D)** Bar graphs representing frequency and diversity of murine light chain V genes paired with BG18 IGH from **(A)** total sample and **(C)** GT5-epitope-specific binders. Murine light chains found in the GC after immunization are marked with bright colors; all others are in greyscale.

## Figure S2

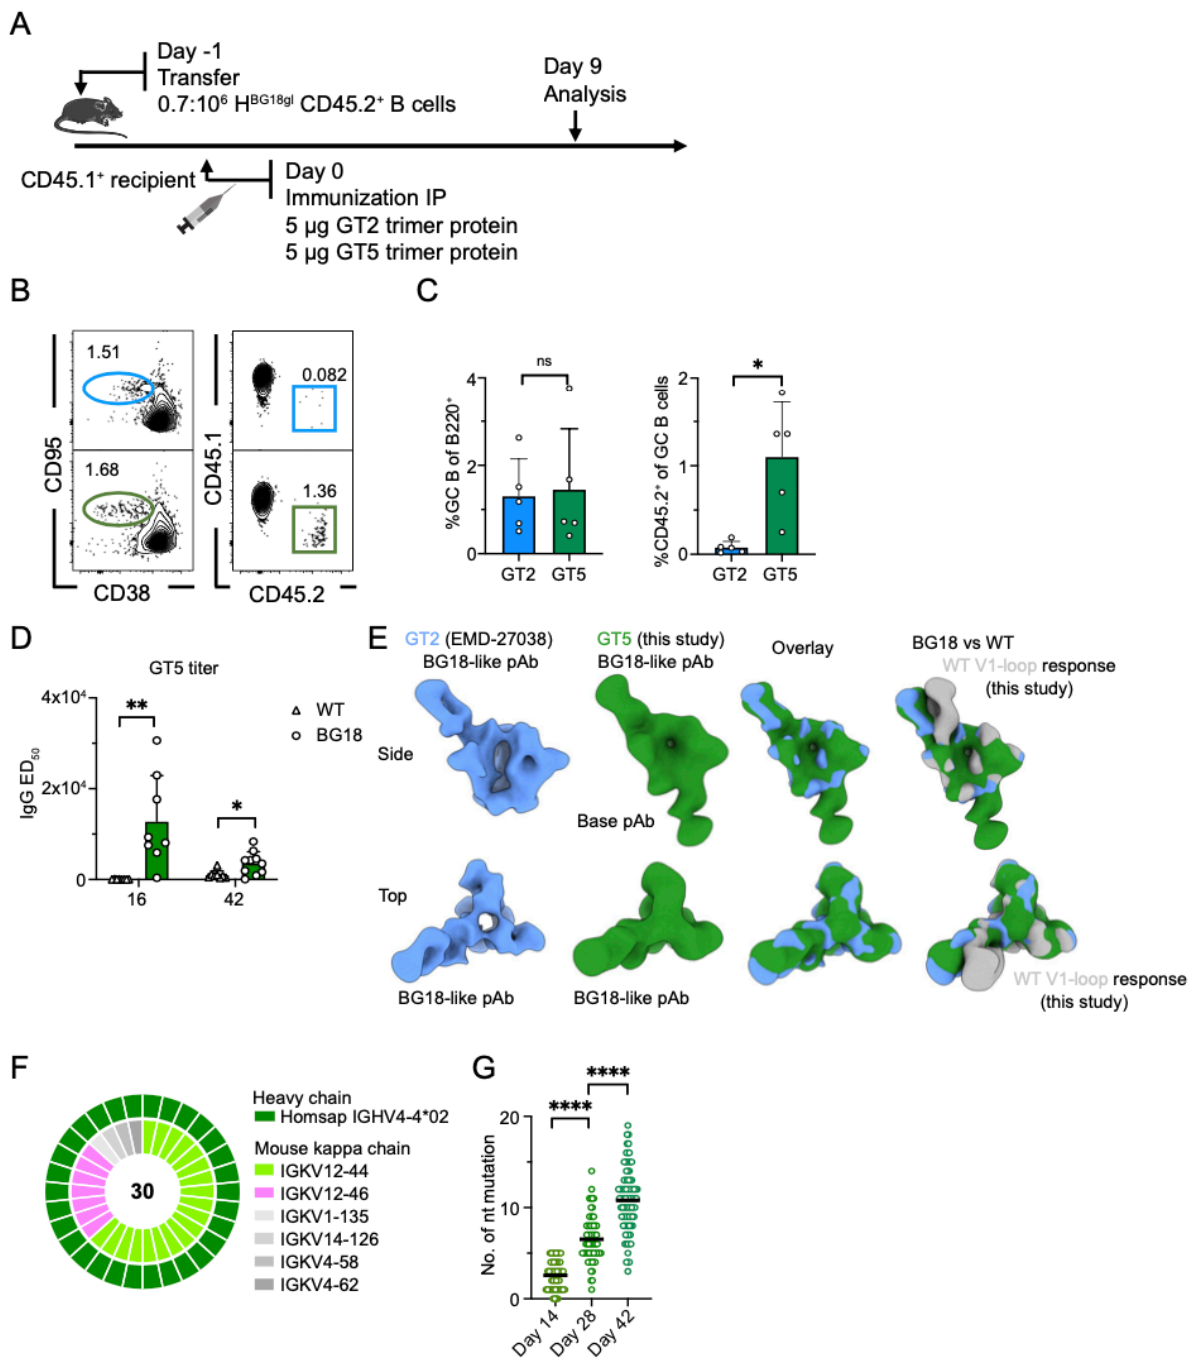

Figure S2. N332-GT5 trimer protein is sufficient to activate BG18<sup>gH</sup> precursors, related to Figures 1 and 2. (A) Schematic showing BG18<sup>gH</sup> B cells adoptive transfer recipients (0.7:10<sup>6</sup>)

primed with GT2 or GT5 trimer protein. Spleen samples were collected at day 9 for analysis; results in B and C. Data collected from a single experimental run. **(B)** Representative flow cytometry plots of GC and CD45.2<sup>+</sup> cells in the GC. Blue represents GT2 and green represents GT5 immunization. **(C)** GC as a percentage of total B cells and percentage of CD45.2<sup>+</sup> B cells in GC. Bars indicate mean + SD. \**p* < 0.05. **(D–F)** Related to **Figure 2**. **(D)** Serum IgG ELISA 50% equilibrium dilution values for GT5 16 and 42 days after GT5 protein immunization. Each symbol represents a different mouse from experiments in each condition: WT (GT5), BG18<sup>gH</sup> (GT5). Samples were pooled from 2–3 experiment with 8–10 mice per group. Statistical analysis was made using 2-way ANOVA with Bonferroni multiple comparison test. Bars indicate mean + SD. \**p* < 0.05, \*\**p* < 0.01. **(E)** Composite nsEMPEM maps of serum pAb responses in immunized animals after N332-GT2 or N332-GT5 trimer protein immunization. **(F)** Paired BCR V region sequence isolated from CD45.2 epitope specific binders (GT5<sup>+</sup>KO<sup>-</sup>) 14 days after GT5 protein immunization (see main **Figure 2F**). **(G)** Heavy chain nucleotide (nt) mutations of all sites of BCRs isolated from CD45.2<sup>+</sup>GT5<sup>+</sup>KO<sup>-</sup>B cells 14, 28 and 42 dpi. Statistical analysis was made using Kruskal-Wallis test. Bars indicate mean. \*\*\*\**p* < 0.0001.

## Figure S3

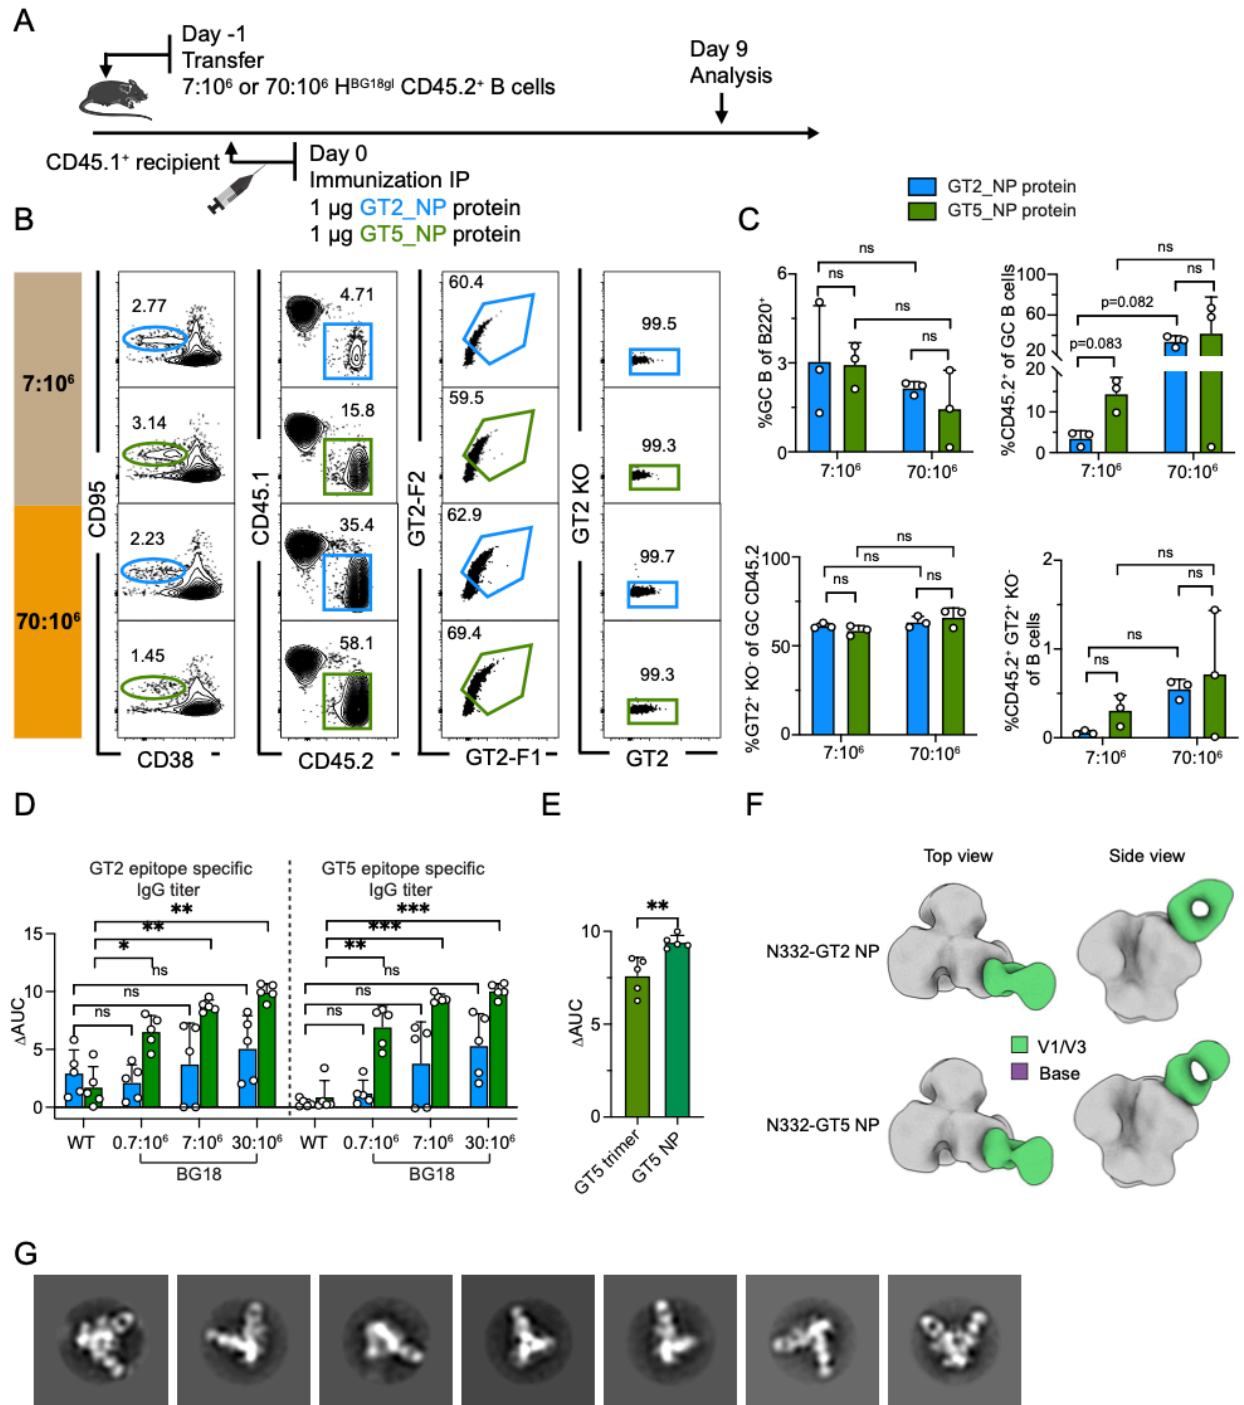

**Figure S3. N332-GT2 and N332-GT5 nanoparticle proteins induce robust BG18<sup>gH</sup> precursor activation, related to Figure 1.** (A) Schematic. Mice were adoptively transferred with variable frequencies of BG18<sup>gH</sup> B cells (day -1) and primed with either 1 µg of GT2 or GT5 nanoparticle (NP) proteins (day 0). Spleen samples were collected on day 9 for analysis. Data collected from a single experimental run. (B) Flow cytometry plots showing GC, CD45.2<sup>+</sup> cell in GC, GT2 binders

of CD45.2 cells in GC and binding specificity. Upper panels 7:10<sup>6</sup>; lower panels 70:10<sup>6</sup>. (C) Frequencies of total GC B cells, CD45.2 cells in GC, GT2 specific binders of CD45.2<sup>+</sup> GC B cell and GT2 specific CD45.2<sup>+</sup> B cell binders in total B cells 9 dpi. Statistical analysis used 2-way ANOVA with Bonferroni multiple comparisons test. Bars indicate mean + SD. <sup>ns</sup>p > 0.05; note scale change above axis break. (D) ELISA quantification of N332-GT2 or N332-GT5-epitope specific IgG in WT mice or BG18<sup>gH</sup> adoptively transferred mice 15 dpi by N332-GT2 or N332-GT5 NP protein. ΔAUC compared for either N332-GT2 and N332-GT2-KO (left) or N332-GT5 and N332-GT5-KO (right) broken by dashed line. Each symbol represents a different mouse. Blue bar represents GT2 NP and Green bar represents GT5 NP immunization. The BG18<sup>gH</sup> precursor frequency was applied as shown in x axis, n=5. Brown-Forsythe and Welch ANOVA with Dunnett's T3 multiple comparison test used; bars indicate mean + SD. \*p < 0.05, \*\*p < 0.01, \*\*\*p < 0.001. (E) ELISA quantification of N332-GT5-epitope specific IgG in BG18<sup>gH</sup> (7:10<sup>6</sup>) adoptively transferred mice 15 dpi by either N332-GT5 trimer or N332-GT5 NP protein. ΔAUC compared for N332-GT5 and N332-GT5-KO. Each symbol represents a different mouse, n=5. Unpaired t test used; bars indicate mean + SD. \*\*p < 0.01. Note: values of N332-GT5 NP are as presented in (D). (F) Composite nsEMPEM maps of serum pAb responses in immunized animals, 14 or 15 days after N332-GT2\_NP (top) or N332-GT5\_NP (bottom) immunization, respectively, with no antibodies against the base visible in 3D classification. (G) Representative 2D class averages shown below. Sera were pooled for each group: N332-GT2\_NP, n=8; N332-GT5\_NP, n=5. Both groups have detectable antibodies against the V1/V3 epitope, with no antibodies against the base visible in 2D classification.

Figure S4

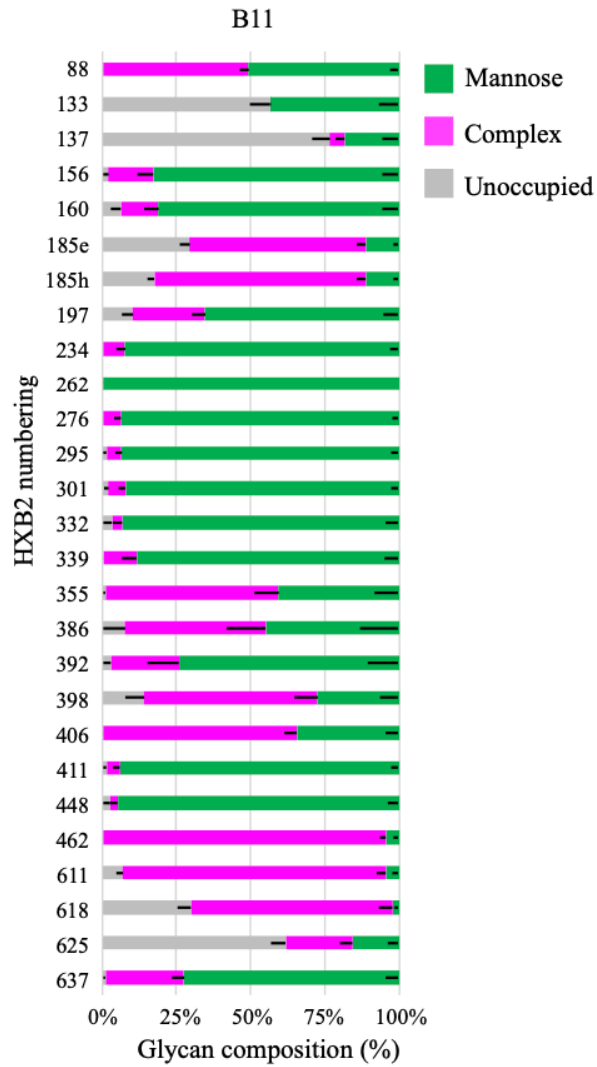

**Figure S4. Glycan composition of the B11 trimer, related to Fig 3.** Mass spectrometry analysis of glycan composition of the B11 trimer. Green (high mannose), pink (complex); gray (unoccupied).



Fig S5

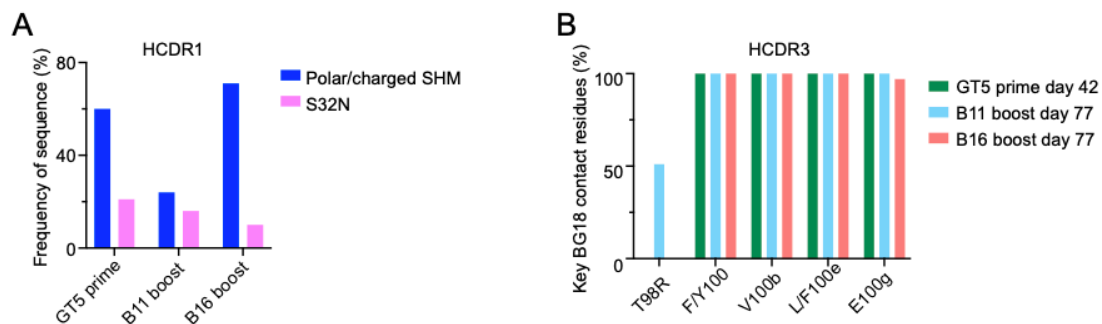

**Figure S5. Mutation analysis of key residues after protein prime or boost, related to Figures 2 and 4.** (A) Frequency of BCR sequences from BG18<sup>gH</sup> derived HCs, derived as in Fig. 4, enriched with polar/charged AA mutations in the HCDR1, including S32N, after priming with GT5 protein or boosting with either B11 or B16 protein. (B) Frequency of BCR sequences from BG18<sup>gH</sup> derived HCs as above containing key BG18 contact residues that were gained or maintained in HCDR3.

Fig S6

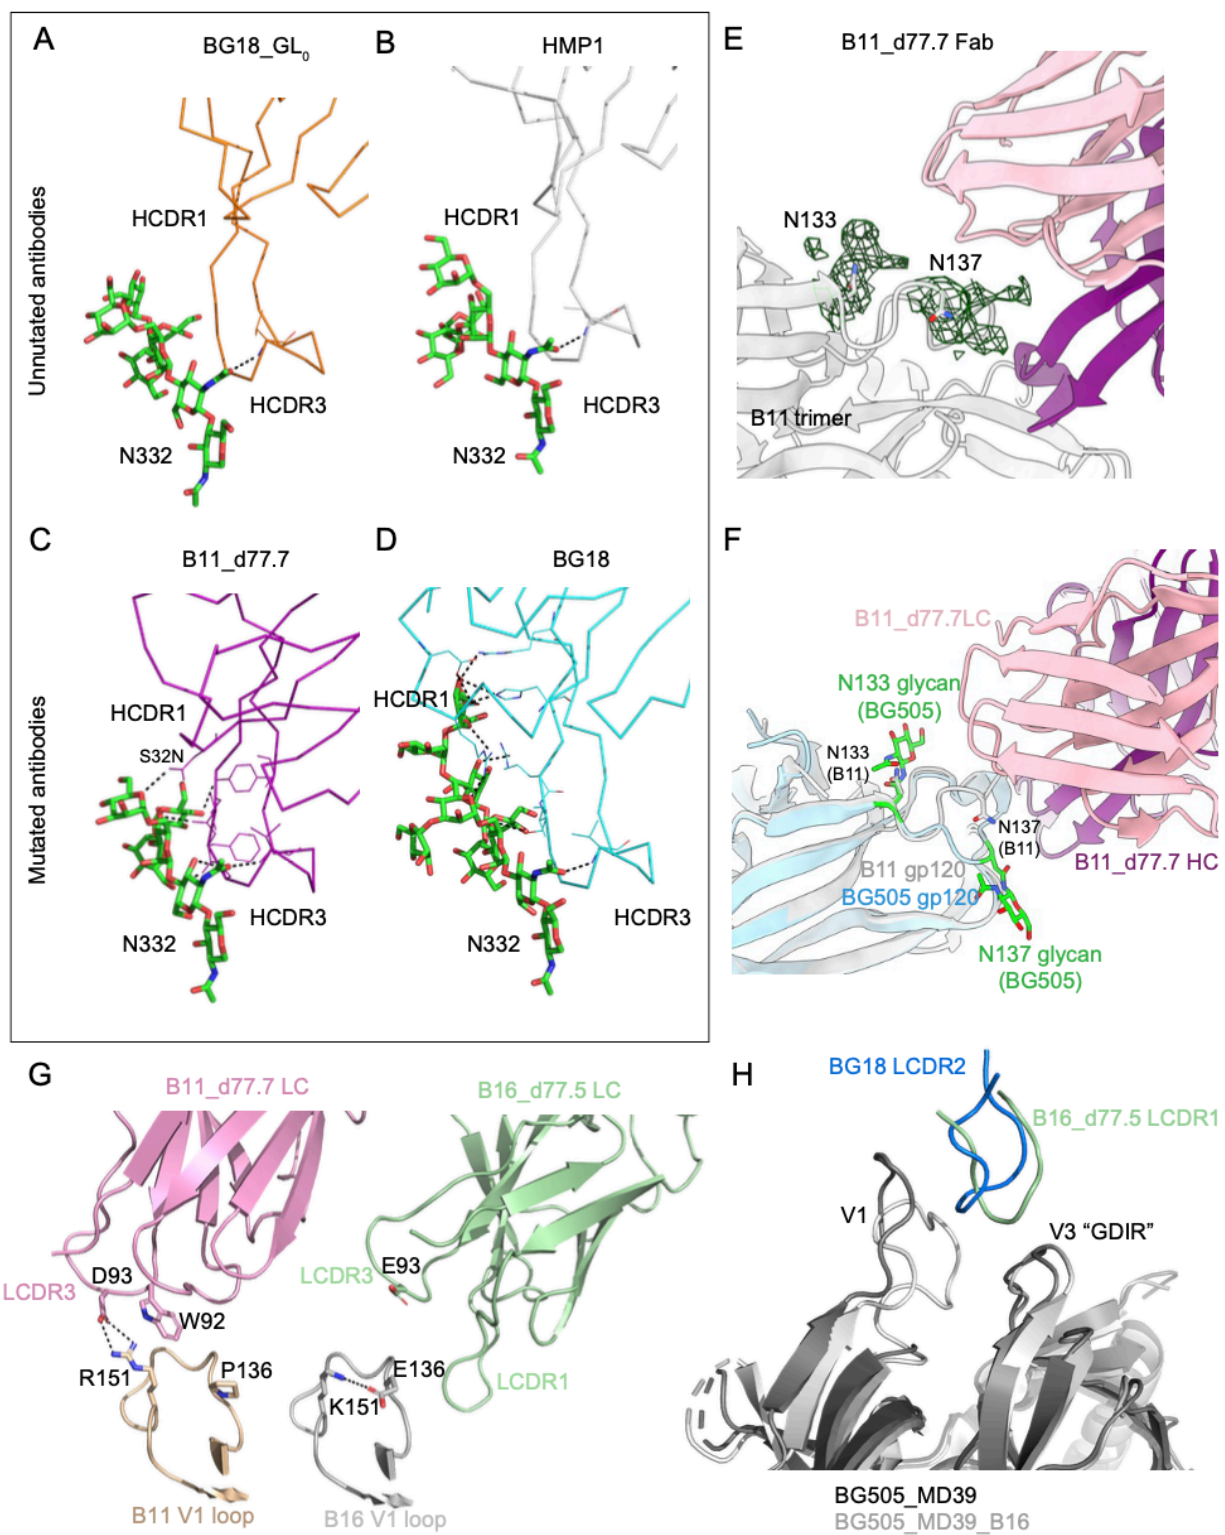

**Figure S6. Increased polar interactions to the N332 glycan in mutated antibody B11\_d77.7, related to Figure 4.** Polar interactions to the N332 glycan are shown from the HCDR1 and HCDR3 of (A) BG18\_GL0 (PDB ID: 6DFH); (B) HMP1 (PDB ID: 6NF5); (C) B11\_d77.7 (this study); (D) BG18 (PDB ID: 6DFG); (E) The N133 and N137 side chains project away from the B11\_d77.7 Fab. Partial cryo-EM density (green mesh) of core sugars of N133 and N137 shown ( $5\sigma$ ). (F) Alignment of BG505 SOSIP gp120 (PDB ID: 6X9R) onto B11 SOSIP gp120 with key modeled V1 glycans displayed as sticks. (G) Comparison of the LC interactions of B11\_d77.7\_Fab and B16\_d77.5\_Fab with the B11 and B16 V1 loops, respectively. Dashed lines represent distances of  $< 4 \text{ \AA}$ . (H) A comparison of the LCDR1 of B16\_d77.5\_Fab (green) and the LCDR2 of mature BG18 (light blue). Both loops make interactions to the conserved base of V3.

## Figure S7

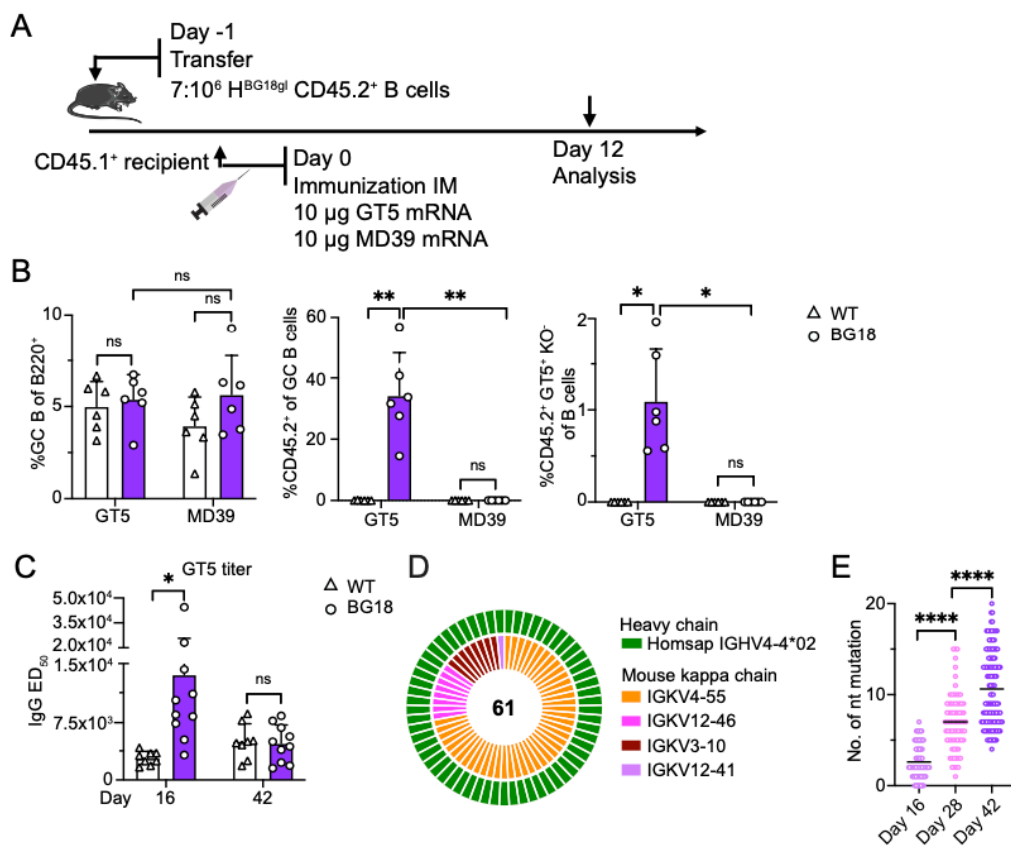

**Figure S7. Membrane-anchored N332-GT5 mRNA but not MD39 mRNA can trigger BG18<sup>gH</sup> precursor activation and SHM, related to Figure 5.** (A) Schematic showing BG18<sup>gH</sup> and WT B cell adoptive transfer recipients immunized with membrane-anchored GT5 or MD39 mRNA. Lymph node samples were collected on day 12 for analysis. Data collected from a single experimental run. (B) Frequencies of GC B cells, CD45.2<sup>+</sup> B cell in GCs and epitope-specific (GT5<sup>+</sup>KO<sup>-</sup>) CD45.2<sup>+</sup> cells as a proportion of total B cells. WT (GT5 mRNA), BG18<sup>gH</sup> (GT5 mRNA), WT (MD39 mRNA), BG18<sup>gH</sup> (MD39 mRNA); n=6 in each group. Statistical analysis using 2-way ANOVA with Bonferroni multiple comparisons test. Bars indicate mean + SD, <sup>ns</sup>p > 0.05, \*p < 0.05, \*\*p < 0.01. (C) Serum IgG ELISA 50% equilibrium dilution values for GT5 16 and 42 days after GT5 mRNA immunization (see main **Figure 5D**). Each symbol represents a different mouse from experiments in each condition: WT (GT5 mRNA), BG18<sup>gH</sup> (GT5 mRNA). Samples were pooled from 2–3 experiments with 8–10 mice per group. Statistical analysis used 2-way ANOVA with Bonferroni multiple comparisons test. Bars indicate mean + SD. <sup>ns</sup>p > 0.05, \*p < 0.05; note scale change above axis break. (D) Paired BCR V region sequence isolated from CD45.2 epitope specific binders (GT5<sup>+</sup>KO<sup>-</sup>) 16 days after GT5 mRNA immunization (see main **Figure 5F**). (E) Heavy chain nt mutations across all sites (see main **Figure 5G**). Statistical analysis used Kruskal-Wallis test. Bars indicate mean. \*\*\*\*p < 0.0001.

**Figure S8**

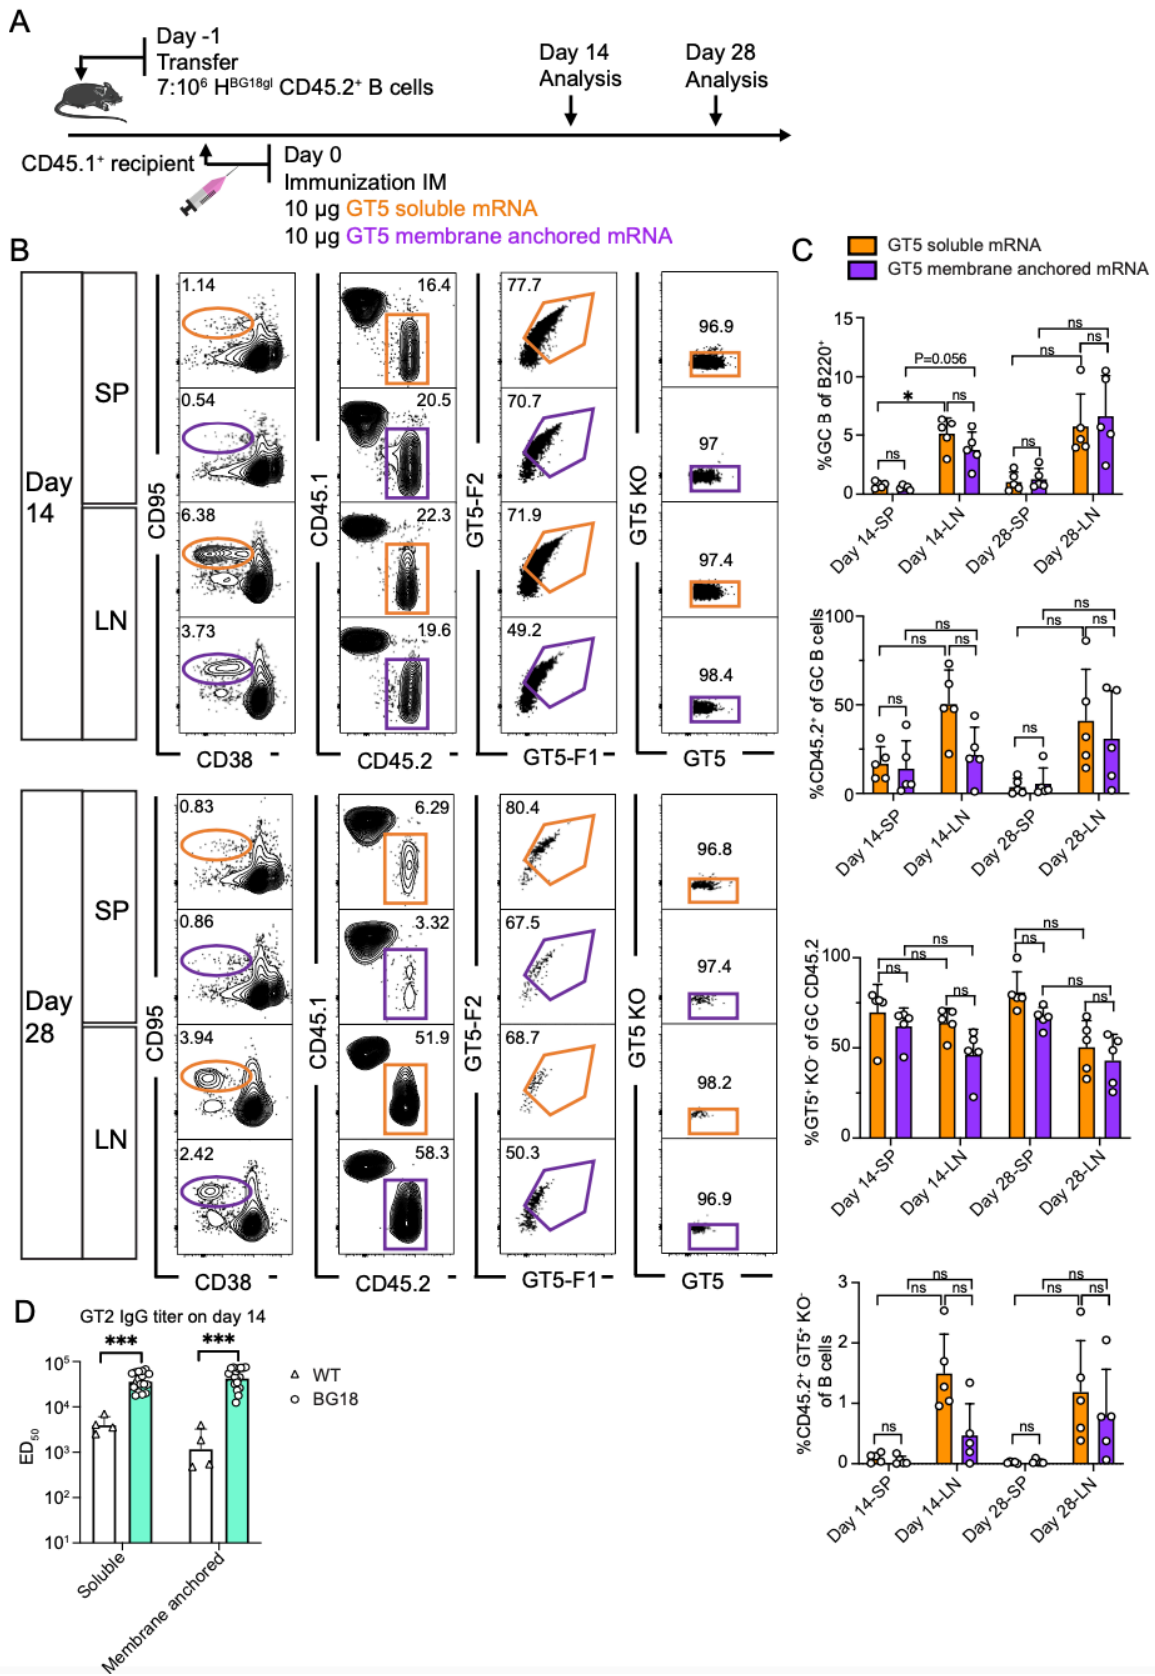

**Figure S8. Soluble and membrane-anchored N332-GT5 mRNA potentiate BG18<sup>gH</sup> cells for activation efficiently and equivalently, related to Figure 5.** (A) Schematic showing BG18<sup>gH</sup> B cell adoptive transfer recipients primed with soluble or membrane-anchored GT5 mRNA via IM on day 0. Spleen (SP), lymph nodes (LN) and serum samples were collected on day 14 and 28 for analysis. Data collected from a single experimental run. (B) Representative flow cytometry plots for SP and LN samples showing GC, CD45.2 cells in GC, GT5 binders of CD45.2<sup>+</sup> cells in GC and GT5 binding specificity 14 days (upper) and 28 days (lower) after soluble or membrane-anchored GT5 mRNA priming. (C) Frequencies of GC B cells, CD45.2<sup>+</sup> cells in GCs, GT5 specific binders among CD45.2<sup>+</sup> GC B cells, and CD45.2<sup>+</sup>GT5<sup>+</sup>KO<sup>-</sup> B cell in total B cells. (D) Serum IgG ELISA 50% equilibrium dilution values for GT2 14 days after GT5 mRNA immunization. Each symbol represents a different mouse from experiments in each condition: WT (soluble GT5 mRNA), n=4; BG18<sup>gH</sup> (soluble GT5 mRNA), n=17; WT (membrane-anchored GT5 mRNA), n=4; BG18<sup>gH</sup> (membrane-anchored GT5 mRNA), n=18; Samples are pooled from 2–3 experiments. Statistical analysis performed using 2-way ANOVA with Bonferroni multiple comparisons test (C) or multiple t-tests (D). Bars indicate mean + SD (C) or geometrical mean + geometrical SD (D). <sup>ns</sup>p > 0.05, \*p < 0.05, \*\*\*p<0.001

Figure S9

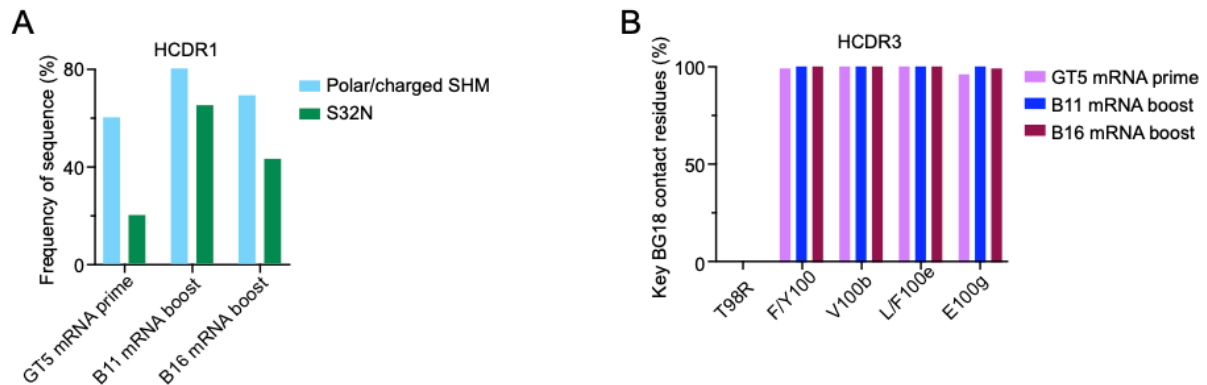

**Figure S9. Mutation analysis after mRNA immunization of key contact residues, related to Fig 7. (A)** Frequency of BCR sequences from BG18<sup>gH</sup> derived HCs, obtained as described in Fig. 7, enriched for polar/charged AA mutations in the HCDR1, including S32N, after priming with GT5 mRNA or boosting with either B11 or B16 mRNA. **(B)** Frequency of BCR sequences from BG18<sup>gH</sup>-derived HCs, as above, which have gained or maintained key BG18 contact residues in HCDR3.

```

BG505_MD65_N332-GT5      AENLWVTVYYGVPVWKDAETTLFCASDAKAYETEKHNWVATHACVPTDPNPQEIHLENVT
BG505_MD39                AENLWVTVYYGVPVWKDAETTLFCASDAKAYETEKHNWVATHACVPTDPNPQEIHLENVT
BG505_MD39_B11           AENLWVTVYYGVPVWKDAETTLFCASDAKAYETEKHNWVATHACVPTDPNPQEIHLENVT
BG505_MD39_B16           AENLWVTVYYGVPVWKDAETTLFCASDAKAYETEKHNWVATHACVPTDPNPQEIHLENVT

BG505_MD65_N332-GT5      EEFNMWKNMVEQMHEDIISLWDQSLKPCVKLTPLCVTLQCTNYAPKLRSMRGEIKNCS
BG505_MD39                EEFNMWKNMVEQMHEDIISLWDQSLKPCVKLTPLCVTLQCTNYAPKLRSMRGEIKNCS
BG505_MD39_B11           EEFNMWKNMVEQMHEDIISLWDQSLKPCVKLTPLCVTLQCTNYAPKLRSMRGEIKNCS
BG505_MD39_B16           EEFNMWKNMVEQMHEDIISLWDQSLKPCVKLTPLCVTLQCTNYAPKLRSMRGEIKNCS

BG505_MD65_N332-GT5      FNMTTELDRDKKQKVYSLFYRLDVVQINENQGNRSNNSNKEYRLINCNTSAITQACPKVSF
BG505_MD39                FNMTTELDRDKKQKVYSLFYRLDVVQINENQGNRSNNSNKEYRLINCNTSAITQACPKVSF
BG505_MD39_B11           FNMTTELDRDKKQKVYSLFYRLDVVQINENQGNRSNNSNKEYRLINCNTSAITQACPKVSF
BG505_MD39_B16           FNMTTELDRDKKQKVYSLFYRLDVVQINENQGNRSNNSNKEYRLINCNTSAITQACPKVSF

BG505_MD65_N332-GT5      EPIPIHYCAPAGFAILKCKDKKFKNGTGPCPSVSTVQCTHGIKPVVSTQLLNGLSLAEEVV
BG505_MD39                EPIPIHYCAPAGFAILKCKDKKFKNGTGPCPSVSTVQCTHGIKPVVSTQLLNGLSLAEEVV
BG505_MD39_B11           EPIPIHYCAPAGFAILKCKDKKFKNGTGPCPSVSTVQCTHGIKPVVSTQLLNGLSLAEEVV
BG505_MD39_B16           EPIPIHYCAPAGFAILKCKDKKFKNGTGPCPSVSTVQCTHGIKPVVSTQLLNGLSLAEEVV

BG505_MD65_N332-GT5      IIRSENITNNAKNILVQLNTPVQINCTRPNNNTVKSIRIGPGQAFYYTGDVIGLHVRMAHC
BG505_MD39                IIRSENITNNAKNILVQLNTPVQINCTRPNNNTVKSIRIGPGQAFYYTGDVIGLHVRMAHC
BG505_MD39_B11           IIRSENITNNAKNILVQLNTPVQINCTRPNNNTVKSIRIGPGQAFYYTGDVIGLHVRMAHC
BG505_MD39_B16           IIRSENITNNAKNILVQLNTPVQINCTRPNNNTVKSIRIGPGQAFYYTGDVIGLHVRMAHC

BG505_MD65_N332-GT5      NVSKATWNETLGKVVVKQLRKHFGNNTIIRFAQSSGGDLEVTTHSFNCGGEFFCYNTSGLF
BG505_MD39                NVSKATWNETLGKVVVKQLRKHFGNNTIIRFAQSSGGDLEVTTHSFNCGGEFFCYNTSGLF
BG505_MD39_B11           NVSKATWNETLGKVVVKQLRKHFGNNTIIRFAQSSGGDLEVTTHSFNCGGEFFCYNTSGLF
BG505_MD39_B16           NVSKATWNETLGKVVVKQLRKHFGNNTIIRFAQSSGGDLEVTTHSFNCGGEFFCYNTSGLF

BG505_MD65_N332-GT5      NSTWISNTSVQGSNSTGSNDSLILPCRIKQIINMWQRIGQAMYAPPIQGIVRCVSNITGL
BG505_MD39                NSTWISNTSVQGSNSTGSNDSLILPCRIKQIINMWQRIGQAMYAPPIQGIVRCVSNITGL
BG505_MD39_B11           NSTWISNTSVQGSNSTGSNDSLILPCRIKQIINMWQRIGQAMYAPPIQGIVRCVSNITGL
BG505_MD39_B16           NSTWISNTSVQGSNSTGSNDSLILPCRIKQIINMWQRIGQAMYAPPIQGIVRCVSNITGL

BG505_MD65_N332-GT5      ILTRDGGSTNSTTETFRPGGGMDRDNWRSELYKYKVVKIEPLGVAPTRCKRRVGRRRRR
BG505_MD39                ILTRDGGSTNSTTETFRPGGGMDRDNWRSELYKYKVVKIEPLGVAPTRCKRRVGRRRRR
BG505_MD39_B11           ILTRDGGSTNSTTETFRPGGGMDRDNWRSELYKYKVVKIEPLGVAPTRCKRRVGRRRRR
BG505_MD39_B16           ILTRDGGSTNSTTETFRPGGGMDRDNWRSELYKYKVVKIEPLGVAPTRCKRRVGRRRRR

BG505_MD65_N332-GT5      RAVGIGAVSLGFLGAAGSTMGAASMTLTVQARNLLSGIVQQSNLLRAPEPQQHLLKTDH
BG505_MD39                RAVGIGAVSLGFLGAAGSTMGAASMTLTVQARNLLSGIVQQSNLLRAPEPQQHLLKTDH
BG505_MD39_B11           RAVGIGAVSLGFLGAAGSTMGAASMTLTVQARNLLSGIVQQSNLLRAPEPQQHLLKTDH
BG505_MD39_B16           RAVGIGAVSLGFLGAAGSTMGAASMTLTVQARNLLSGIVQQSNLLRAPEPQQHLLKTDH

BG505_MD65_N332-GT5      WGIKQLQARVLAVEHYLRDQQLLGIWGCSSGKLICTNVPWNSSWSNRNLSEIWDNMTWLQ
BG505_MD39                WGIKQLQARVLAVEHYLRDQQLLGIWGCSSGKLICTNVPWNSSWSNRNLSEIWDNMTWLQ
BG505_MD39_B11           WGIKQLQARVLAVEHYLRDQQLLGIWGCSSGKLICTNVPWNSSWSNRNLSEIWDNMTWLQ
BG505_MD39_B16           WGIKQLQARVLAVEHYLRDQQLLGIWGCSSGKLICTNVPWNSSWSNRNLSEIWDNMTWLQ

BG505_MD65_N332-GT5      WDKEISNYTQIIYGLLEESQNQQEKNEQDLLALD
BG505_MD39                WDKEISNYTQIIYGLLEESQNQQEKNEQDLLALD
BG505_MD39_B11           WDKEISNYTQIIYGLLEESQNQQEKNEQDLLALD
BG505_MD39_B16           WDKEISNYTQIIYGLLEESQNQQEKNEQDLLALD

>N332-GT5-NP
AENLWVTVYYGVPVWKDAETTLFCASDAKAYETEKHNWVATHACVPTDPNPQEIHLENVTEEFNMWKNMVEQMHEDIISLWDQSLKPCVKLTPLCVTLQCTNYAPKLRSMRGEIKNCS
SFNMTTELDRDKKQKVYSLFYRLDVVQINENQGNRSNNSNKEYRLINCNTSAITQACPKVSFEPIPIHYCAPAGFAILKCKDKKFKNGTGPCPSVSTVQCTHGIKPVVSTQLLNGLSLAEE
EVIIRSENITNNAKNILVQLNTPVQINCTRPNNTVKSIRIGPGQAFYYTGDVIGLHVRMAHCNISKATWNETLGKVVVKQLRKHFGNNTIIRFAQSSGGDLEVTTHSFNCGGEFFCYNTS
GLFNSTWISNTSVQGSNSTGSNDSLILPCRIKQIINMWQRIGQAMYAPPIQGIVRCVSNITGLILTRDGGSTNSTTETFRPGGGMDRDNWRSELYKYKVVKIEPLGVAPTRCKREVVR
RRRRRAVGIGAVSLGFLGAAGSTMGAASMTLTVQARNLLSGIVQQSNLLRAPEPQQHLLKTDHWGIKQLQARVLAVEHYLRDQQLLGIWGCSSGKLICTNVPWNSSWSNRNLSEIWDN
MTWLQWDKEISNYTQIIYGLLEESQNQQEKNEQDLLALDGSGLSKDI IKLLNEQVNKEMQSSNLYMSMSWCYTHSLDAGLFLFDHAAEEYEHAKKLIIFLNENNVPVQLTSSISAPE
HKFEGLTQIFQKAYEHEQHISESINNIVDHAIKSKDHATFNFLQWYVAEQHEEVLFDKILDKIELIGNENHGLYLADQYVVKGIKAKSRKS

```

**Figure S10. Amino acid sequence of protein constructs used in this study, related to Methods.** Green highlights indicate amino acid changes relative to BG505\_MD39. MD65 mutations have been reported in (59).



|                        |                                                                                               |
|------------------------|-----------------------------------------------------------------------------------------------|
| MD65.2_N332-GT5_gp151  | AENLWVTVVYGVVWPKDAETTLFCASDAKAYETEKHNWVWATHACVPTDPNPQEIHLNVT                                  |
| MD65.2_N332-GT5_gp140  | AENLWVTVVYGVVWPKDAETTLFCASDAKAYETEKHNWVWATHACVPTDPNPQEIHLNVT                                  |
| BG505_MD39.3_gp151     | AENLWVTVVYGVVWPKDAETTLFCASDAKAYETEKHNWVWATHACVPTDPNPQEIHLNVT                                  |
| BG505_MD39.2_B11_gp151 | AENLWVTVVYGVVWPKDAETTLFCASDAKAYETEKHNWVWATHACVPTDPNPQEIHLNVT                                  |
| BG505_MD39.2_B16_gp151 | AENLWVTVVYGVVWPKDAETTLFCASDAKAYETEKHNWVWATHACVPTDPNPQEIHLNVT                                  |
| MD65.2_N332-GT5_gp151  | EEFNMWKNMVEQMHEDIISLWDQSLKPCVKLTPLCVTLQCTN <b>YAPKLRSM</b> MRGE <b>IR</b> KNC                 |
| MD65.2_N332-GT5_gp140  | EEFNMWKNMVEQMHEDIISLWDQSLKPCVKLTPLCVTLQCTN <b>YAPKLRSM</b> MRGE <b>IR</b> KNC                 |
| BG505_MD39.3_gp151     | EEFNMWKNMVEQMHEDIISLWDQSLKPCVKLTPLCVTLQCTN <b>YAPKLRSM</b> MRGE <b>IR</b> KNC                 |
| BG505_MD39.2_B11_gp151 | EEFNMWKNMVEQMHEDIISLWDQSLKPCVKLTPLCVTLQCTN <b>YAPKLRSM</b> MRGE <b>IR</b> KNC                 |
| BG505_MD39.2_B16_gp151 | EEFNMWKNMVEQMHEDIISLWDQSLKPCVKLTPLCVTLQCTN <b>YAPKLRSM</b> MRGE <b>IR</b> KNC                 |
| MD65.2_N332-GT5_gp151  | FNMTTELDRDKKQVYSLFYRLDVVQINENQGNRSNNSNKEYRLINCNTSAITQACPKVVF                                  |
| MD65.2_N332-GT5_gp140  | FNMTTELDRDKKQVYSLFYRLDVVQINENQGNRSNNSNKEYRLINCNTSAITQACPKVVF                                  |
| BG505_MD39.3_gp151     | FNMTTELDRDKKQVYSLFYRLDVVQINENQGNRSNNSNKEYRLINCNTSAITQACPKVVF                                  |
| BG505_MD39.2_B11_gp151 | FNMTTELDRDKKQVYSLFYRLDVVQINENQGNRSNNSNKEYRLINCNTSAITQACPKVVF                                  |
| BG505_MD39.2_B16_gp151 | FNMTTELDRDKKQVYSLFYRLDVVQINENQGNRSNNSNKEYRLINCNTSAITQACPKVVF                                  |
| MD65.2_N332-GT5_gp151  | EPIPIHYCAPAGFAILKCKDKKFNVTG <b>PCPS</b> VSTVQCTHGIKPVVSTQLLNGLSLAEEEV                         |
| MD65.2_N332-GT5_gp140  | EPIPIHYCAPAGFAILKCKDKKFNVTG <b>PCPS</b> VSTVQCTHGIKPVVSTQLLNGLSLAEEEV                         |
| BG505_MD39.3_gp151     | EPIPIHYCAPAGFAILKCKDKKFNVTG <b>PCPS</b> VSTVQCTHGIKPVVSTQLLNGLSLAEEEV                         |
| BG505_MD39.2_B11_gp151 | EPIPIHYCAPAGFAILKCKDKKFNVTG <b>PCPS</b> VSTVQCTHGIKPVVSTQLLNGLSLAEEEV                         |
| BG505_MD39.2_B16_gp151 | EPIPIHYCAPAGFAILKCKDKKFNVTG <b>PCPS</b> VSTVQCTHGIKPVVSTQLLNGLSLAEEEV                         |
| MD65.2_N332-GT5_gp151  | IIRSENIITNNAKNIILVQLNT <b>IVQ</b> INCTRP <b>NN</b> TVKSIRIGPGQAFYY <b>IGDI</b> <b>IR</b> QAHC |
| MD65.2_N332-GT5_gp140  | IIRSENIITNNAKNIILVQLNT <b>IVQ</b> INCTRP <b>NN</b> TVKSIRIGPGQAFYY <b>IGDI</b> <b>IR</b> QAHC |
| BG505_MD39.3_gp151     | IIRSENIITNNAKNIILVQLNT <b>IVQ</b> INCTRP <b>NN</b> TVKSIRIGPGQAFYY <b>IGDI</b> <b>IR</b> QAHC |
| BG505_MD39.2_B11_gp151 | IIRSENIITNNAKNIILVQLNT <b>IVQ</b> INCTRP <b>NN</b> TVKSIRIGPGQAFYY <b>IGDI</b> <b>IR</b> QAHC |
| BG505_MD39.2_B16_gp151 | IIRSENIITNNAKNIILVQLNT <b>IVQ</b> INCTRP <b>NN</b> TVKSIRIGPGQAFYY <b>IGDI</b> <b>IR</b> QAHC |
| MD65.2_N332-GT5_gp151  | <b>N</b> SKATWNETLGKVVVKQLRKHFGNNTIIRFAQSSGGDLEVTTHSFNCGGEFFYCYNTSGLF                         |
| MD65.2_N332-GT5_gp140  | <b>N</b> SKATWNETLGKVVVKQLRKHFGNNTIIRFAQSSGGDLEVTTHSFNCGGEFFYCYNTSGLF                         |
| BG505_MD39.3_gp151     | <b>N</b> SKATWNETLGKVVVKQLRKHFGNNTIIRFAQSSGGDLEVTTHSFNCGGEFFYCYNTSGLF                         |
| BG505_MD39.2_B11_gp151 | <b>N</b> SKATWNETLGKVVVKQLRKHFGNNTIIRFAQSSGGDLEVTTHSFNCGGEFFYCYNTSGLF                         |
| BG505_MD39.2_B16_gp151 | <b>N</b> SKATWNETLGKVVVKQLRKHFGNNTIIRFAQSSGGDLEVTTHSFNCGGEFFYCYNTSGLF                         |
| MD65.2_N332-GT5_gp151  | NSTWISNTSVQGSNSTGSNDS <b>IL</b> LPC <b>IK</b> QIINMWQRIGQAMYAPPIQGVIRCVSNITGL                 |
| MD65.2_N332-GT5_gp140  | NSTWISNTSVQGSNSTGSNDS <b>IL</b> LPC <b>IK</b> QIINMWQRIGQAMYAPPIQGVIRCVSNITGL                 |
| BG505_MD39.3_gp151     | NSTWISNTSVQGSNSTGSNDS <b>ITL</b> PCR <b>IK</b> QIINMWQRIGQAMYAPPIQGVIRCVSNITGL                |
| BG505_MD39.2_B11_gp151 | NSTWISNTSVQGSNSTGSNDS <b>ITL</b> PCR <b>IK</b> QIINMWQRIGQAMYAPPIQGVIRCVSNITGL                |
| BG505_MD39.2_B16_gp151 | NSTWISNTSVQGSNSTGSNDS <b>ITL</b> PCR <b>IK</b> QIINMWQRIGQAMYAPPIQGVIRCVSNITGL                |
| MD65.2_N332-GT5_gp151  | ILTRDGGSTNSTTETFRPGGGDMRDNWRSELYKYVVKIEPLGVAPTRCKRR <b>IV</b> GSHSGS                          |
| MD65.2_N332-GT5_gp140  | ILTRDGGSTNSTTETFRPGGGDMRDNWRSELYKYVVKIEPLGVAPTRCKRR <b>IV</b> GSHSGS                          |
| BG505_MD39.3_gp151     | ILTRDGGSTNSTTETFRPGGGDMRDNWRSELYKYVVKIEPLGVAPTRCKRR <b>IV</b> GSHSGS                          |
| BG505_MD39.2_B11_gp151 | ILTRDGGSTNSTTETFRPGGGDMRDNWRSELYKYVVKIEPLGVAPTRCKRR <b>IV</b> GSHSGS                          |
| BG505_MD39.2_B16_gp151 | ILTRDGGSTNSTTETFRPGGGDMRDNWRSELYKYVVKIEPLGVAPTRCKRR <b>IV</b> GSHSGS                          |
| MD65.2_N332-GT5_gp151  | GGSGSGGHA <b>AV</b> IGAVSLGFLGAAGSTMGAASMTLTVQARNLLSGIVQQSNLLRAPEPQ                           |
| MD65.2_N332-GT5_gp140  | GGSGSGGHA <b>AV</b> IGAVSLGFLGAAGSTMGAASMTLTVQARNLLSGIVQQSNLLRAPEPQ                           |
| BG505_MD39.3_gp151     | GGSGSGGHA <b>AV</b> IGAVSLGFLGAAGSTMGAASMTLTVQARNLLSGIVQQSNLLRAPEPQ                           |
| BG505_MD39.2_B11_gp151 | GGSGSGGHA <b>AV</b> IGAVSLGFLGAAGSTMGAASMTLTVQARNLLSGIVQQSNLLRAPEPQ                           |
| BG505_MD39.2_B16_gp151 | GGSGSGGHA <b>AV</b> IGAVSLGFLGAAGSTMGAASMTLTVQARNLLSGIVQQSNLLRAPEPQ                           |
| MD65.2_N332-GT5_gp151  | QHLLKDTHWGIKQLQARVLAVEHYLRDQQLLGIWGC SGKLI CCTNVPWNSWSNRNLSEI                                 |
| MD65.2_N332-GT5_gp140  | QHLLKDTHWGIKQLQARVLAVEHYLRDQQLLGIWGC SGKLI CCTNVPWNSWSNRNLSEI                                 |
| BG505_MD39.3_gp151     | QHLLKDTHWGIKQLQARVLAVEHYLRDQQLLGIWGC SGKLI CCTNVPWNSWSNRNLSEI                                 |
| BG505_MD39.2_B11_gp151 | QHLLKDTHWGIKQLQARVLAVEHYLRDQQLLGIWGC SGKLI CCTNVPWNSWSNRNLSEI                                 |
| BG505_MD39.2_B16_gp151 | QHLLKDTHWGIKQLQARVLAVEHYLRDQQLLGIWGC SGKLI CCTNVPWNSWSNRNLSEI                                 |
| MD65.2_N332-GT5_gp151  | WDNMTWLQWDKEISNYTQIIYGLLEESQNQQEKNEQDLLALDKWASLWNWFDISNWLWYI                                  |
| MD65.2_N332-GT5_gp140  | WDNMTWLQWDKEISNYTQIIYGLLEESQNQQEKNEQDLLALD-----                                               |
| BG505_MD39.3_gp151     | WDNMTWLQWDKEISNYTQIIYGLLEESQNQQEKNEQDLLALDKWASLWNWFDISNWLWYI                                  |
| BG505_MD39.2_B11_gp151 | WDNMTWLQWDKEISNYTQIIYGLLEESQNQQEKNEQDLLALDKWASLWNWFDISNWLWYI                                  |
| BG505_MD39.2_B16_gp151 | WDNMTWLQWDKEISNYTQIIYGLLEESQNQQEKNEQDLLALDKWASLWNWFDISNWLWYI                                  |
| MD65.2_N332-GT5_gp151  | KIFIMIVGGLIGLRIVFAVLSVIHRVR                                                                   |
| MD65.2_N332-GT5_gp140  | -----                                                                                         |
| BG505_MD39.3_gp151     | KIFIMIVGGLIGLRIVFAVLSVIHRVR                                                                   |
| BG505_MD39.2_B11_gp151 | KIFIMIVGGLIGLRIVFAVLSVIHRVR                                                                   |
| BG505_MD39.2_B16_gp151 | KIFIMIVGGLIGLRIVFAVLSVIHRVR                                                                   |

**Figure S11. Amino acid sequence of mRNA constructs used in this study, related to Methods.** gp151 indicates membrane bound trimer (52); gp140 indicates soluble trimer. Green highlights indicate amino acid changes relative to BG505\_MD39.3\_gp151. The addition of .2 to the name indicates the furin cleavage site has been replaced with a 14 aa linker (19). The addition of .3 to the name indicates the presence of the 14 aa linker at the furin cleavage site as well as the addition of glycosylation sites at positions 241 and 289 (101).

**Table S1. CryoEM data collection, processing and model building statistics.**

| Map                                          | BG505_MD64_N332-<br>GT5 + BG18HCgl<br>mice polyclonal Fab | BG505_MD64_N332-<br>GT5 + WT mice<br>polyclonal Fab | BG505_MD39_B11<br>+ B11_d77.7 Fab +<br>RM20A3 Fab | BG505_MD39_B16<br>+ B16_d77.5 Fab +<br>RM20A3 Fab |
|----------------------------------------------|-----------------------------------------------------------|-----------------------------------------------------|---------------------------------------------------|---------------------------------------------------|
| EMDB                                         | EMD-28942                                                 | EMD-28945                                           | EMD-28941                                         | EMD-43190                                         |
| <b>Data collection</b>                       |                                                           |                                                     |                                                   |                                                   |
| Microscope                                   | TFS Titan Krios                                           | TFS Glacios                                         | TFS Talos Arctica                                 | TFS Glacios                                       |
| Voltage (kV)                                 | 300                                                       | 200                                                 | 200                                               | 200                                               |
| Detector                                     | Gatan K3                                                  | TFS Falcon 4                                        | Gatan K2 Summit                                   | TFS Falcon 4                                      |
| Recording mode                               | Super-resolution                                          | Counting                                            | Counting                                          | Counting                                          |
| Nominal magnification                        | 29,000x                                                   | 190,000x                                            | 36,000x                                           | 190,000x                                          |
| Movie micrograph pixelsize (Å)               | 0.40075                                                   | 0.725                                               | 1.15                                              | 0.725                                             |
| Number of frames (Falcon 4 EER fractions)    | 60                                                        | 40                                                  | 49                                                | 40                                                |
| Total dose (e-/Å <sup>2</sup> )              | 79                                                        | 40                                                  | 51                                                | 45                                                |
| Defocus range (µm)                           | -0.8 to -2.5                                              | -0.5 to -1.8                                        | -0.7 to -1.5                                      | -0.5 to -1.8                                      |
| <b>EM data processing</b>                    |                                                           |                                                     |                                                   |                                                   |
| Number of movie micrographs                  | 9,459                                                     | 9,547                                               | 2,072                                             | 3,510                                             |
| Number of molecular projection images in map | 23,292                                                    | 11,058                                              | 129,821                                           | 39,822                                            |
| Symmetry                                     | C1                                                        | C1                                                  | C3                                                | C1                                                |
| Map pixel size                               | 0.8015                                                    | 1.0457                                              | 1.15                                              | 1.044                                             |
| Map resolution (FSC 0.143; Å)                | 3.2                                                       | 4.1                                                 | 3.1                                               | 3.3                                               |
| Map sharpening B-factor (Å <sup>2</sup> )    | -58.1                                                     | -22.3                                               | -97.9                                             | 43                                                |
| <b>Structure building and validation</b>     |                                                           |                                                     |                                                   |                                                   |
| <i>Number of atoms in deposited model</i>    |                                                           |                                                     |                                                   |                                                   |
| HIV Env trimer                               | 13,080                                                    | 13,136                                              | 13,191                                            | 13,221                                            |
| Polyclonal Fv (as poly-alanine)              | 1,160                                                     | 1,115                                               | n/a                                               | n/a                                               |
| Monoclonal Fv                                | n/a                                                       | 5,178                                               | 10,611                                            | 7,065                                             |
| glycans                                      | 914                                                       | 884                                                 | 1,080                                             | 954                                               |
| MolProbity score                             | 0.74                                                      | 1.18                                                | 0.97                                              | 1.14                                              |
| Clashscore                                   | 0.76                                                      | 2.24                                                | 0.84                                              | 2.86                                              |
| Map correlation coefficient                  | 0.74                                                      | 0.75                                                | 0.83                                              | 0.84                                              |
| EMRinger score                               | 3.18                                                      | 1.48                                                | 3.69                                              | 3.76                                              |
| d FSC model (0.5; Å)                         | 3.7                                                       | 4.3                                                 | 3.2                                               | 3.4                                               |
| <i>RMSD from ideal</i>                       |                                                           |                                                     |                                                   |                                                   |
| Bond length (Å)                              | 0.006                                                     | 0.005                                               | 0.006                                             | 0.007                                             |
| Bond angles (°)                              | 1.245                                                     | 0.870                                               | 1.267                                             | 1.197                                             |
| <i>Ramachandran plot</i>                     |                                                           |                                                     |                                                   |                                                   |
| Favored (%)                                  | 98.26                                                     | 96.97                                               | 96.70                                             | 97.69                                             |
| Allowed (%)                                  | 1.74                                                      | 3.03                                                | 3.30                                              | 2.31                                              |
| Outliers (%)                                 | 0.00                                                      | 0.00                                                | 0.00                                              | 0.00                                              |
| Side chain rotamer outliers (%)              | 0.14                                                      | 0.20                                                | 0.00                                              | 0.27                                              |
| Cβ outliers (%)                              | 0.00                                                      | 0.00                                                | 0.00                                              | 0.04                                              |
| PDB                                          | 8f9g                                                      | 8f9m                                                | 8f92                                              | 8fv                                               |

**Table S2. Table of reagents**

| <b>Antibodies</b>                              | <b>Supplier</b> | <b>Cat_number</b> |
|------------------------------------------------|-----------------|-------------------|
| BV786-B220                                     | BD Bioscience   | 563894            |
| Alexa Fluor 594-B220                           | BioLegend       | 103254            |
| Alexa Fluor 700-Gr1                            | BioLegend       | 108422            |
| Alexa Fluor 700-CD3                            | BioLegend       | 100216            |
| Alexa Fluor 700-F4/80                          | BioLegend       | 123130            |
| BV510-CD38                                     | BD Bioscience   | 740129            |
| PE-Cy7-CD95                                    | BD Bioscience   | 557653            |
| PerCP Cy5.5-CD45.1                             | BioLegend       | 110728            |
| PE-CD45.2                                      | BioLegend       | 109808            |
| BV786-CD45.2                                   | BD Bioscience   | 563686            |
| BUV395-IgG1                                    | BD Bioscience   | 742481            |
| APC-Cy7-IgM                                    | BioLegend       | 406516            |
| BV650-IgD                                      | BioLegend       | 405721            |
| <b>Commercial chemicals</b>                    |                 |                   |
| LIVE/DEAD™ Fixable Blue<br>Dead Cell Stain Kit | Invitrogen      | L23105            |
| Alexa Fluor 647-Streptavidin                   | BioLegend       | 405237            |
| BV421- Streptavidin                            | BD Bioscience   | 563259            |
| Alexa Fluor 488-Streptavidin                   | BioLegend       | 405235            |
| Alexa Fluor 594-Streptavidin                   | BioLegend       | 405240            |
| Sigma Adjuvant                                 | Sigma           | S6322             |
| ACK lysing buffer                              | Lonza           | BP10-548E         |
